# Supplementary material
Source: publisher figshare collection journal article supplement (https://acs.figshare.com/ndownloader/files/23890517)
Supplement: Supplementary file 1 [file 23890517]

Unexpected Differences Between Two Closely Related Bacterial P450  
Camphor Monooxygenases

Vidhi C. Murarka, Dipanwita Batabyal<sup>\$</sup>, Jose A. Amaya, Irina F. Sevrioukova,  
Thomas L. Poulos<sup>\*</sup>

Departments of Molecular Biology and Biochemistry, Pharmaceutical Sciences, and  
Chemistry, University of California, Irvine, California 92697-3900

\*poulos@uci.edu

<sup>\$</sup>,Current address: Amgen Inc, Higher Order Structure, Attribute Sciences, Thousand  
Oaks, CA 91320

|          |                                                                   |
|----------|-------------------------------------------------------------------|
| CYP101D1 | MNAQTSTATQKHRVAP-PPHVPGHLIREIDAYDLGLEQGFHEAWKRVQQPDTPLLVWTP       |
| P450tcu  | --MSTEAIQSNANLAPLPPHVPEHLVDFDMMYNPPNISEGVQKAWATLQGPVNPVNIWTR      |
| P450cam  | --MTTETIQSNANLAPLPPHVPEHLVDFDMMYNPSNLSAGVQEAWAVLQESNVFDLVWTR      |
|          | *.: .: .: ** ***** *: :*: *: .:. *: **: * .: .: *                 |
| CYP101D1 | FTGGHWIATRGTLIDEIYRSPERFSSRVIWVPREAGEAYDMVPTKLDPPPEHTPYRKAIIDK    |
| P450tcu  | CNGGHWIATRGRLIREAFEDPAHFSSECPFIPREAGEAYDFIPTSMDDPEQRQFRALASS      |
| P450cam  | CNGGHWIATRGQLIREAYEDYRHSSECPFIPREAGEAYDFIPTSMDDPEQRQFRALANQ       |
|          | .***** ** * : . .*** : :*****: **: :*****: :* ..                  |
| CYP101D1 | GLNLAEIRKLEDQIRTIAVEIIEGFADGHCFGSEFSTVFPVRVFLALAGLPVEDATKL        |
| P450tcu  | VVGMPVVDKMEGHIRELACSLIDNIRLQGHCFNTEFAEPFPIRIFMLLAGLPKDIPHL        |
| P450cam  | VVGMPVVDKLENRIQELACSLIESLRPQGCNTEFYAEPFPIRIFMLLAGLPEDIPHL         |
|          | :.:. : *: .*. :* .: :*. :* :*: * :*: * :*: * :*: * :*: *          |
| CYP101D1 | GLLANEMTRPSGNTPEEQGRSLEAANKGFFEYVAPIIAARRGGSGTDLITRILNVEIDGK      |
| P450tcu  | KYLSQDMTRPDGSM-----TFAEARDALYEYLMPIIAERKLKPCDAISVIANGQVNGR        |
| P450cam  | KYLTQDMTRPDGSM-----TFAEAKAALYDLIPIIEQRQKPGTDAISIVANGQVNGR         |
|          | *: :*****. : : * . . : :*: * . . * : * : * : *                    |
| CYP101D1 | PMPDDRALGLVSLLLGGLDVTVNFLGFMMIYLSRHPETVAEMRREPLKLRGVEELFRR        |
| P450tcu  | PITSDEAKKMCGLLVGGLDVTVNFLSFCMEFLAKSPEHRKELIEHPERIPAAATEELLRR      |
| P450cam  | PITSDEAKRMCGLLVGGLDVTVNFLSFSMEFLAKSPEHRQELIERPERIPAAACEELLRR      |
|          | *: . . * : .***:*****. * * :*: * * :* * : . * : . * : *           |
| CYP101D1 | FAVVSDARYVVSDFEHFGTMLKEGDLILLPTALHGLDDRHHDDPMTVDLSRRDVTHTSTFA     |
| P450tcu  | FSLVADGRILKSDLEFHGVLLKKGDQILLPQLLSGLDERENACPMHVDGFRQKVSHTTFG      |
| P450cam  | FSLVADGRILTSDFEHGVQLKKGDQILLPQLLSGLDERENACPMHVDGFRQKVSHTTFG       |
|          | *: :*: . * : * * *****. **: * * ***** * :*: * : * * : . * : * : * |
| CYP101D1 | QGPHRCAGMHLARLEVTVMLQEWLARIPFRLKDRAPVIYHSGIVAAVENIPLWEPEQRV       |
| P450tcu  | HGSHLCGLQHLARREIVTTLREWLARIPDFAIAPGAQVRHQSGIVSGVHALPLVWDPATT      |
| P450cam  | HGSHLCGLQHLARREIIVTLKEWLTRIPDFSIAPGAQIQHKSIVSGVQALPLVWDPATT       |
|          | :* . * * * ***** * : . * .*****:*****: : * : :*****: * : * * * *  |
| CYP101D1 | SA-                                                               |
| P450tcu  | KAV                                                               |
| P450cam  | KAV                                                               |
|          | . *                                                               |

**Figure S1** Sequence alignment of CYP101D1, P450tcu and P450cam. Sequence alignments were made the EMBL-EBI sequence analysis tools (<http://europepmv.org/article/MED/3097693>)

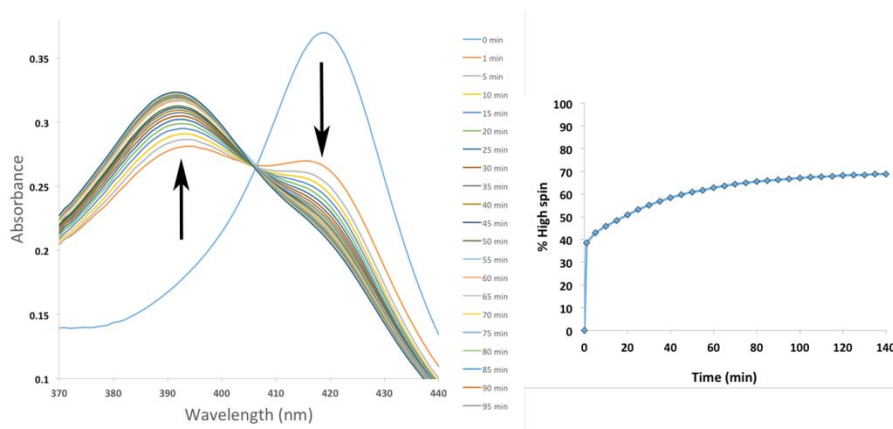

**Figure S2** – Time dependent spectral changes after the addition of 1mM camphor. Since P450tcu does not undergo a full low- to high-spin transition, the expected spectral changes for 100% conversion were obtained from P450cam and used to estimate the per cent high-spin. P450tcu undergoes about 40% conversion within 1 minute followed by a slow conversion to about 70% high-spin with a half-life  $\approx$ 25min.

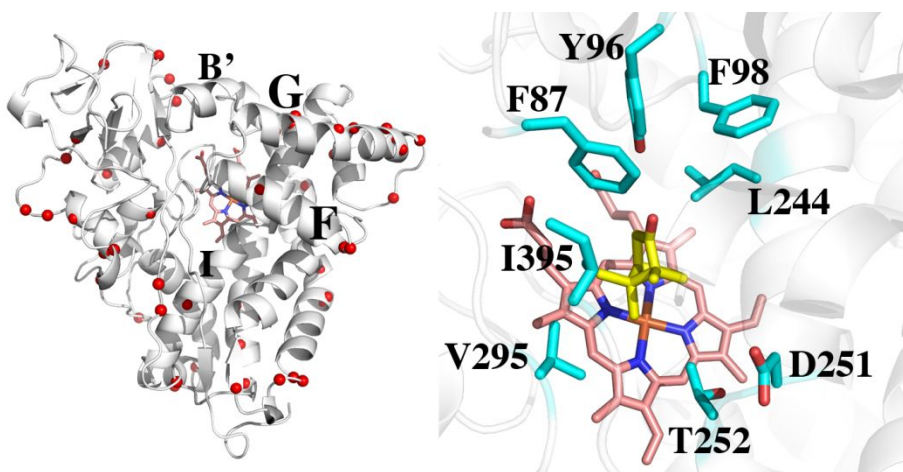

**Figure S3** – Ribbon diagram of P450tcu with the location of sequence differences between P450tcu and P450cam highlighted as red spheres. A majority of the differences are located on or near the surface of the protein. The active site residues near the camphor are identical in both enzymes.

**Table S1:** Crystallographic Data Collection and Refinement Statistics

|                                             | P450tcu                                        |
|---------------------------------------------|------------------------------------------------|
| PDB entry                                   | 6WPL                                           |
| Space group                                 | P 2 <sub>1</sub> 2 <sub>1</sub> 2 <sub>1</sub> |
| Resolution (Å)                              | 2.1                                            |
| Completeness (%)                            | 95.64 (82.55)*                                 |
| Number of unique reflections                | 22980 (1878)                                   |
| $R_{\text{sym}}$ or $R_{\text{merge}}$      | 0.0882 (0.6425)                                |
| $R_{\text{pim}}$                            | 0.0882 (0.6425)                                |
| $I/\sigma(I)$                               | 4.93 (2.42)                                    |
| $B$ factor (mean) (Å <sup>2</sup> )         | 24.81                                          |
| $R_{\text{work}}$                           | 0.1934 (0.2424)                                |
| $R_{\text{free}}$                           | 0.2468 (0.3128)                                |
| Root-mean-square deviation for bonds (Å)    | 0.008                                          |
| Root-mean-square deviation for angles (deg) | 1.07                                           |
| Ramachandran favored (%)                    | 96.53                                          |
| Ramachandran allowed (%)                    | 2.72                                           |
| Ramachandran outliers (%)                   | 0.74                                           |

Values in the () are for the highest resolution shell
